# Supplementary material for: Azaindole-1,2,3-triazole conjugate as selective fluorometric sensor for dihydrogenphosphate
Source: Royal Society of Chemistry journal article supplement (doi:10.1039/c3ra42702a), 2013-01-01

## Azaindole-1,2,3-triazole conjugate as selective fluorometric sensor for dihydrogenphosphate

Kumares Ghosh<sup>\*a</sup>, Debasis Kar<sup>a</sup>, Soumen Joardar<sup>a</sup>, Debashis Sahu<sup>b,c</sup>, Bishwajit Ganguly<sup>\*b,c</sup>

<sup>a</sup>Department of Chemistry, University of Kalyani, Kalyani, Nadia-741235, India, Email: ghosh\_k2003@yahoo.co.in, <sup>b</sup>Computation and Simulation Unit (Analytical Discipline and Centralized Instrument Facility), CSIR-Central Salt and Marine Chemicals Research Institute, Bhavnagar, Gujarat, 364002. <sup>c</sup>Academy of Scientific and Innovative Research; CSIR- Central Salt and Marine Chemicals Research Institute, Bhavnagar, Gujarat, 364002, India.

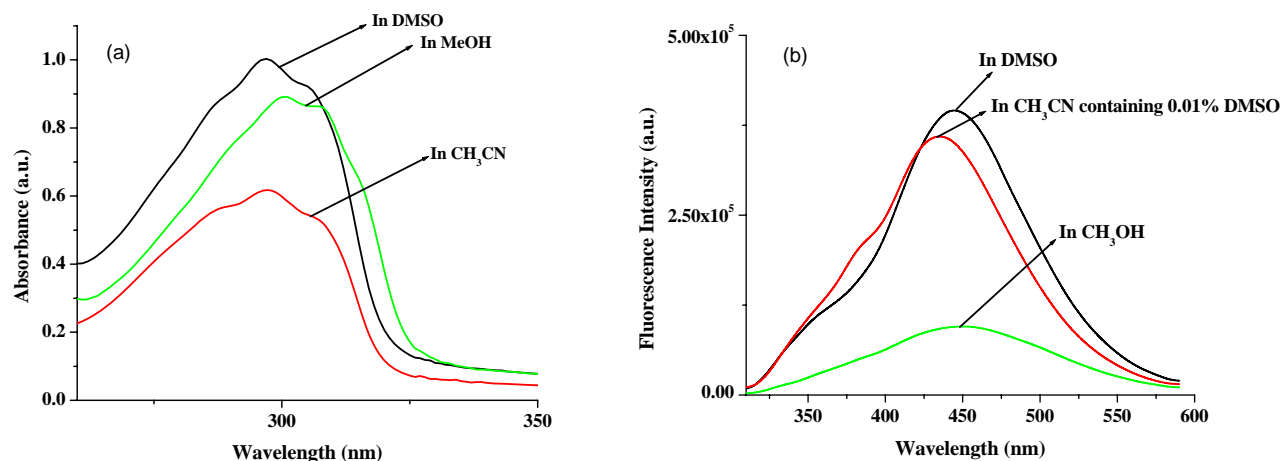

**Figure 1S.** (a) Absorption and (b) emission spectra of **3** ( $c = 3.09 \times 10^{-5}$  M) in different solvents.

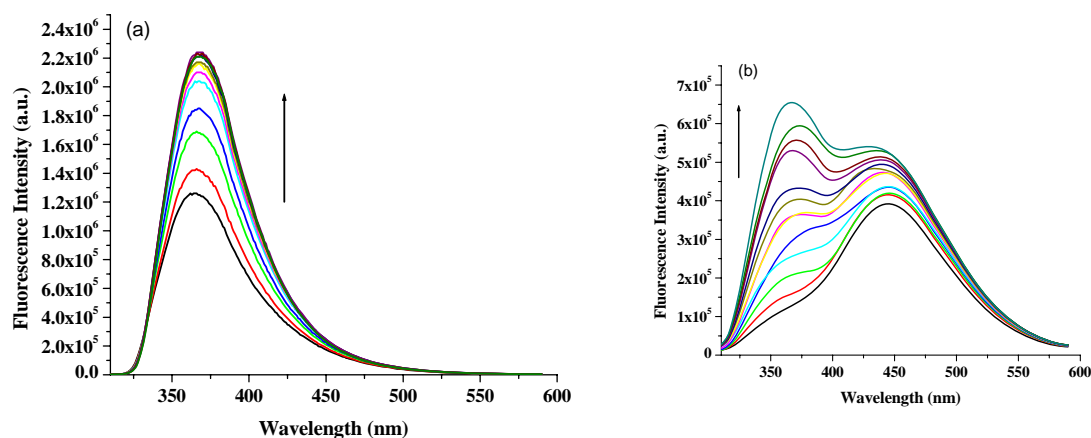

**Figure 2S.** Change in emission of (a) **1** ( $c = 3.23 \times 10^{-5}$  M) and (b) **3** ( $c = 4.25 \times 10^{-5}$  M) upon titration with DMSO in CH<sub>3</sub>CN containing 0.01% DMSO.

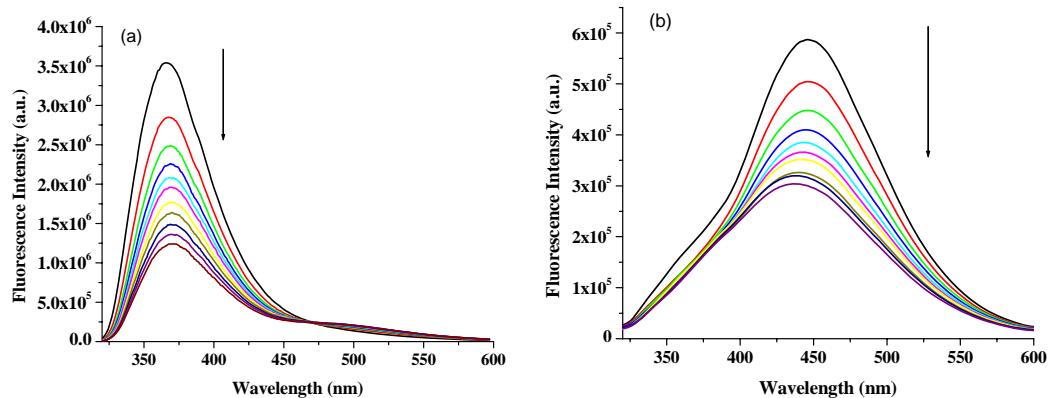

**Figure 3S.** Change in emission of (a) **1** ( $c = 3.25 \times 10^{-5} \text{ M}$ ) and (b) **3** ( $c = 3.09 \times 10^{-5} \text{ M}$ ) upon titration with  $\text{CH}_3\text{OH}$  in  $\text{CH}_3\text{CN}$  containing 0.01% DMSO.

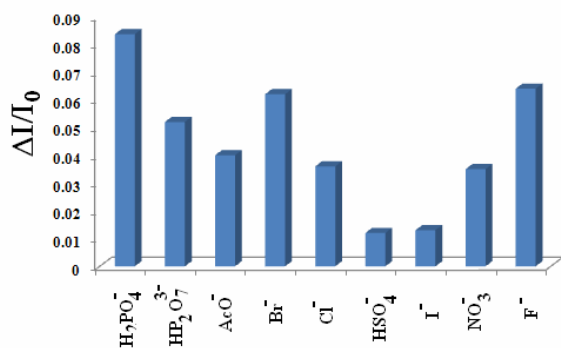

**Figure 4S.** Change in fluorescence ratio of **1** ( $c = 4.52 \times 10^{-5} \text{ M}$ ) at 370 nm upon addition of 15 equiv. amounts of different guests in DMSO.

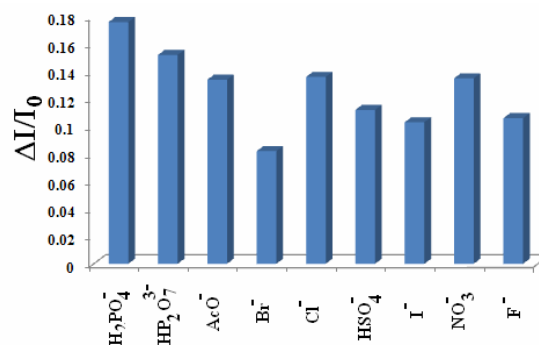

**Figure 5S.** Change in fluorescence ratio of **3** ( $c = 3.45 \times 10^{-5} \text{ M}$ ) at 370 nm upon addition of 15 equiv. amounts of different guests in DMSO.

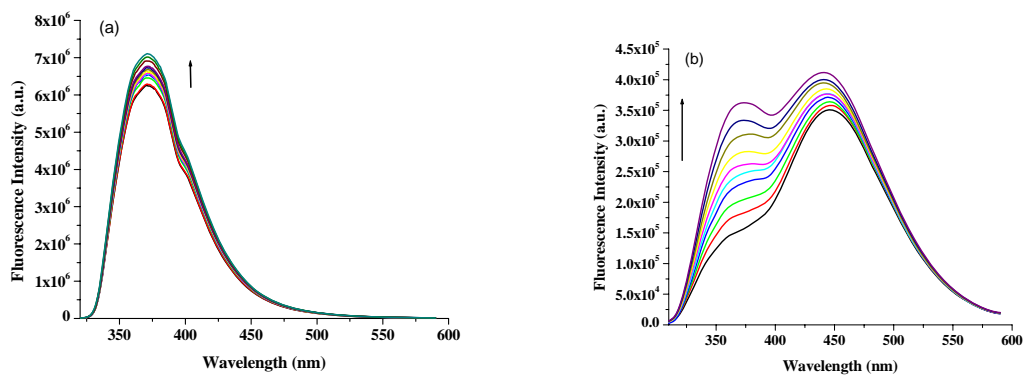

**Figure 6S.** Change in emission of (a) **1** ( $c = 4.52 \times 10^{-5} \text{ M}$ ) and (b) **3** ( $c = 3.63 \times 10^{-5} \text{ M}$ ) when titrated with  $\text{H}_2\text{PO}_4^-$  ( $c = 1 \times 10^{-3} \text{ M}$ ) in DMSO.

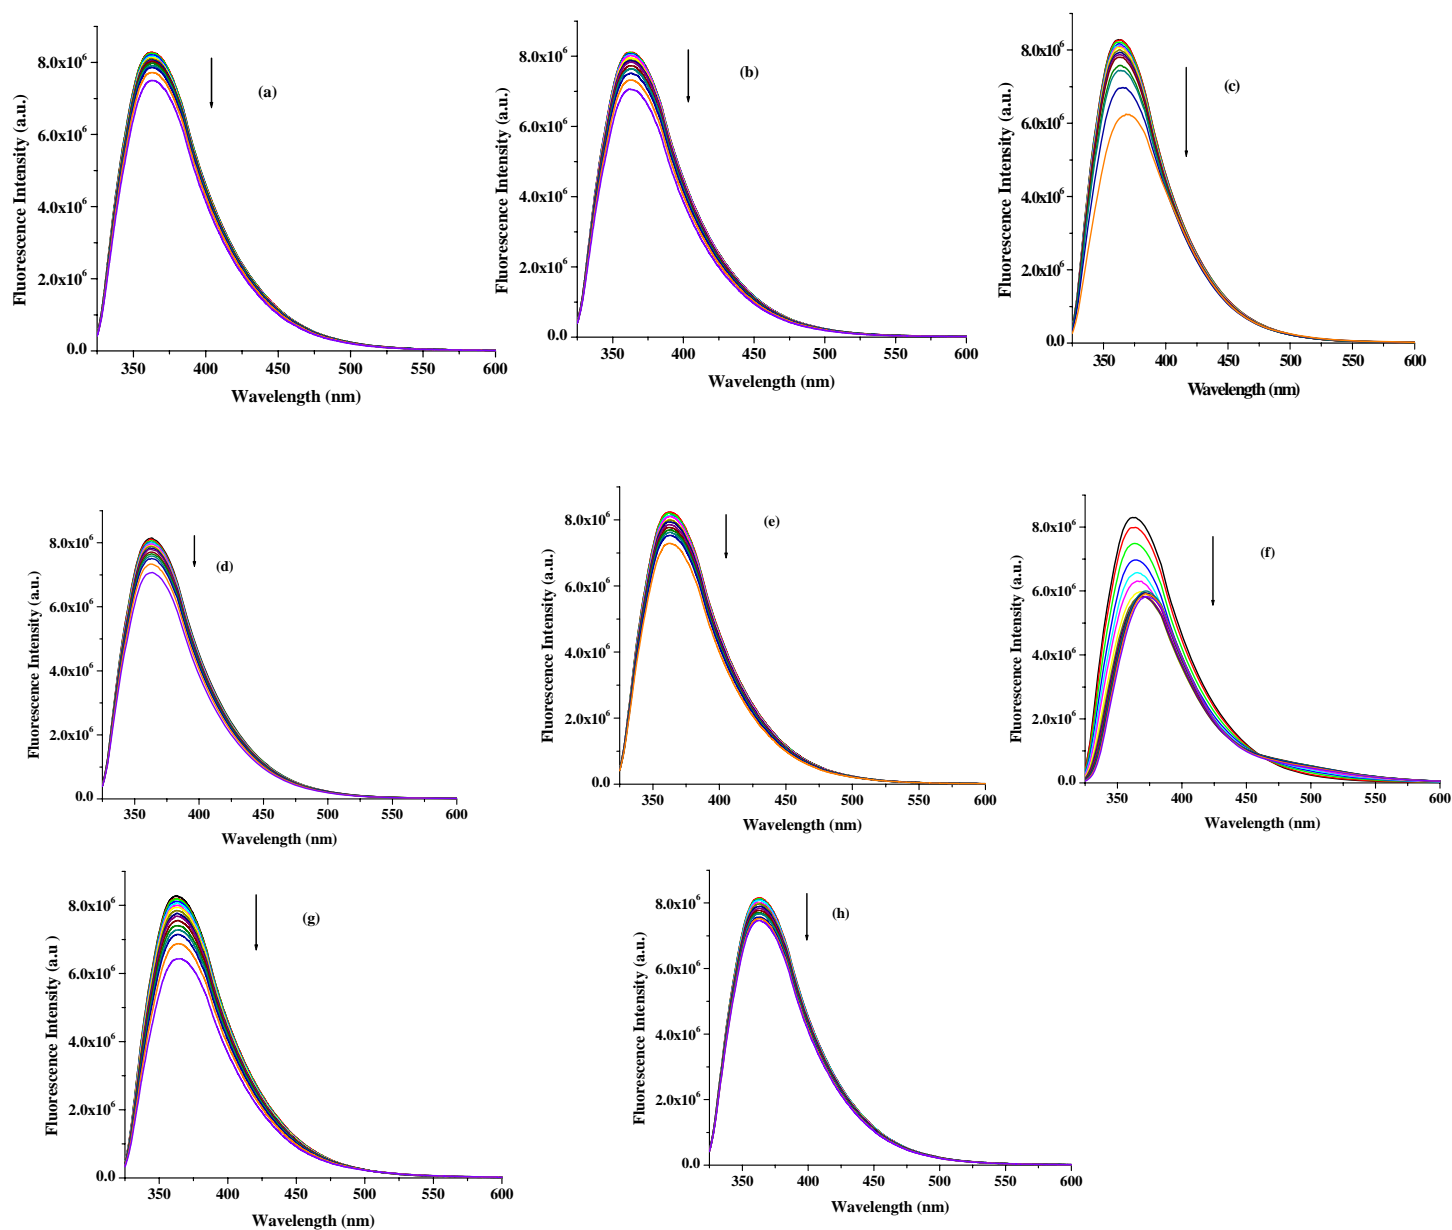

**Figure 7S.** Change in emission of **1** ( $c = 2.51 \times 10^{-5} \text{ M}$ ) upon addition of a)  $\text{Cl}^-$ , b)  $\text{Br}^-$ , c)  $\text{F}^-$ , (d)  $\text{I}^-$ , e)  $\text{HSO}_4^-$ , (f)  $\text{HP}_2\text{O}_7^{3-}$ , (g)  $\text{AcO}^-$ , (h)  $\text{NO}_3^-$  in  $\text{CH}_3\text{CN}$  containing 0.01% DMSO.

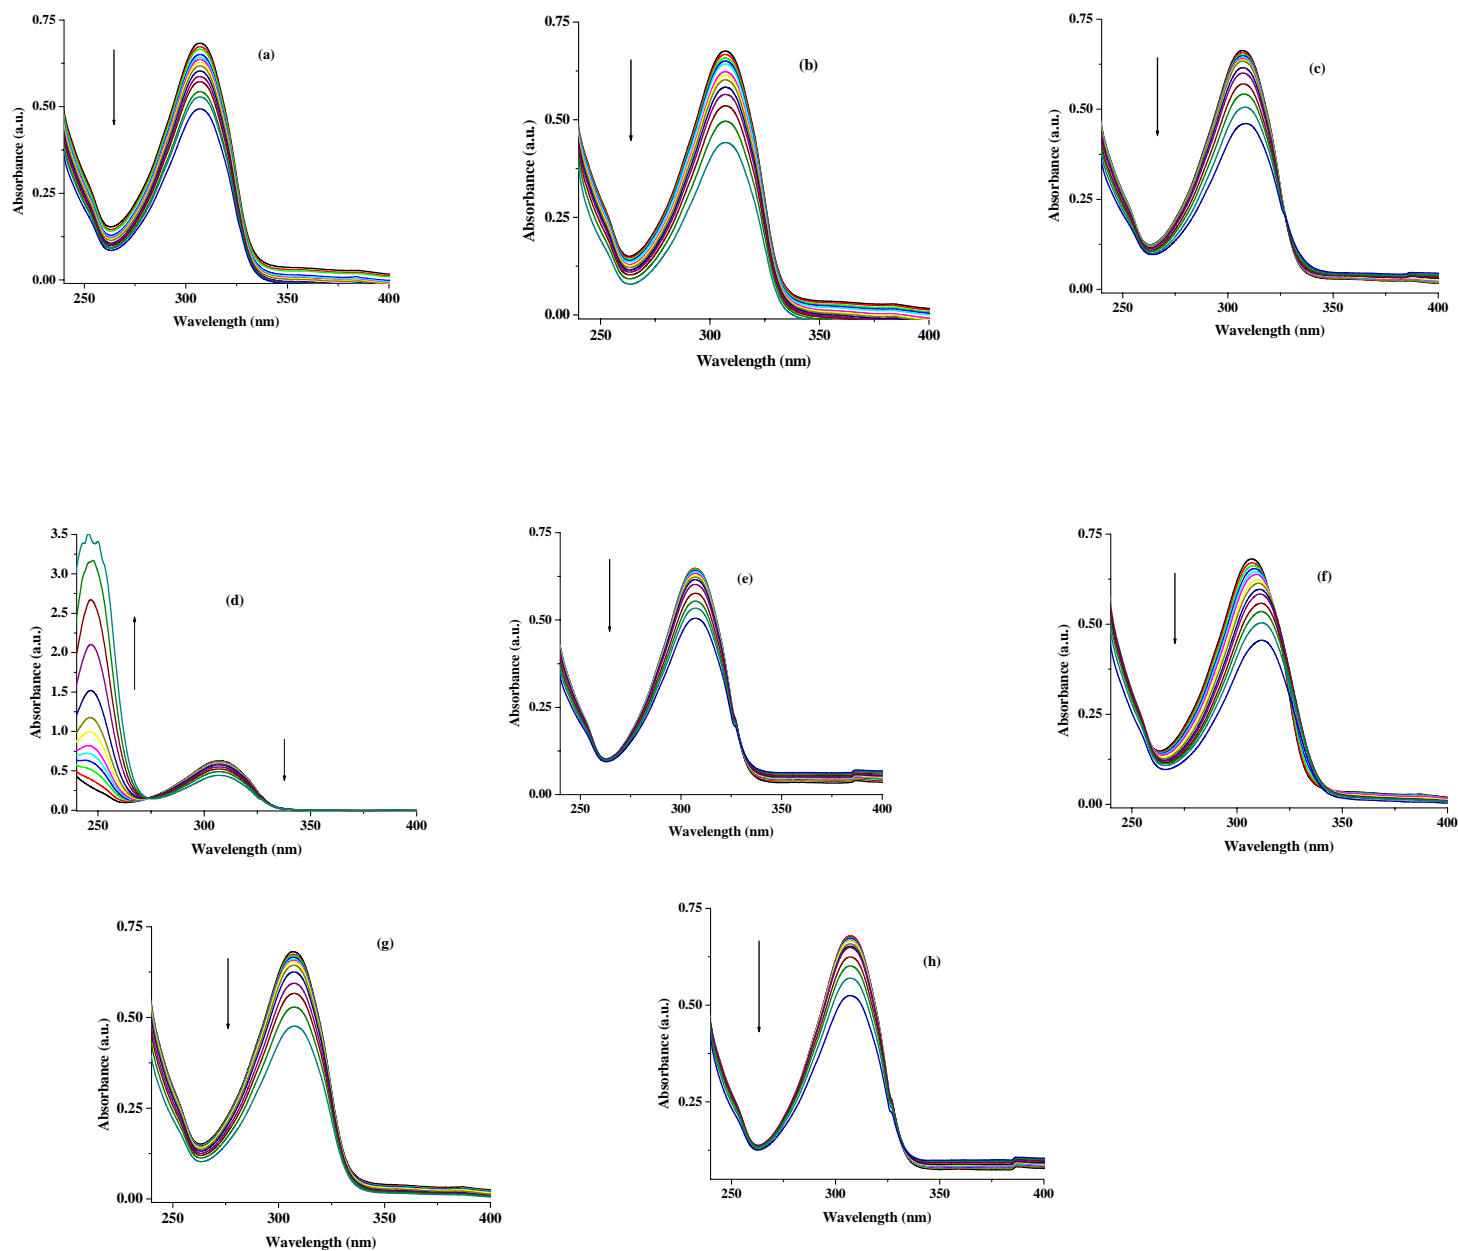

**Figure 8S.** Change in absorbance of 1 ( $c = 2.51 \times 10^{-5} \text{ M}$ ) upon addition of a)  $\text{Cl}^-$ , b)  $\text{Br}^-$ , c)  $\text{F}^-$ , (d)  $\text{I}^-$ , e)  $\text{HSO}_4^-$ , (f)  $\text{HP}_2\text{O}_7^{3-}$ , (g)  $\text{AcO}^-$ , (h)  $\text{NO}_3^-$  in  $\text{CH}_3\text{CN}$  containing 0.01% DMSO.

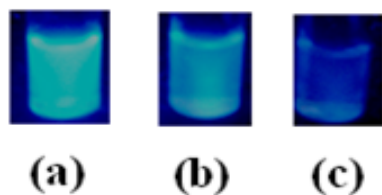

**Figure 9S.** Photographs of color change of (a) **1** ( $c = 2.5 \times 10^{-5}$  M) and with 15 equiv. amounts of (b)  $\text{HP}_2\text{O}_7^{3-}$  ( $c = 1 \times 10^{-3}$  M) and (c)  $\text{H}_2\text{PO}_4^-$  ( $c = 1 \times 10^{-3}$  M) under UV illumination.

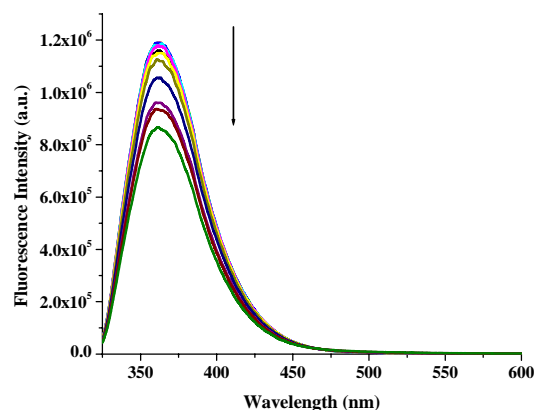

**Figure 10S.** Change in emission of receptor **2** ( $c = 2.21 \times 10^{-5}$  M) upon addition of 15 equiv. amounts of  $\text{H}_2\text{PO}_4^-$  ( $c = 1 \times 10^{-3}$  M) in  $\text{CH}_3\text{CN}$  containing 0.01% DMSO.

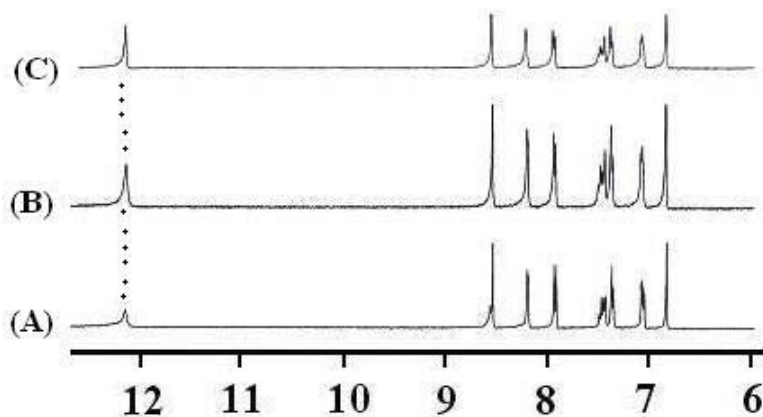

**Figure 11S.** Partial  $^1\text{H}$  NMR (400 MHz) of **1** ( $c = 5.01 \times 10^{-3}$  M) in the absence (A) and presence of 1 equiv (B) and 2 equiv (C) amounts of tetrabutylammonium dihydrogenphosphate in  $\text{d}_6$ -DMSO.

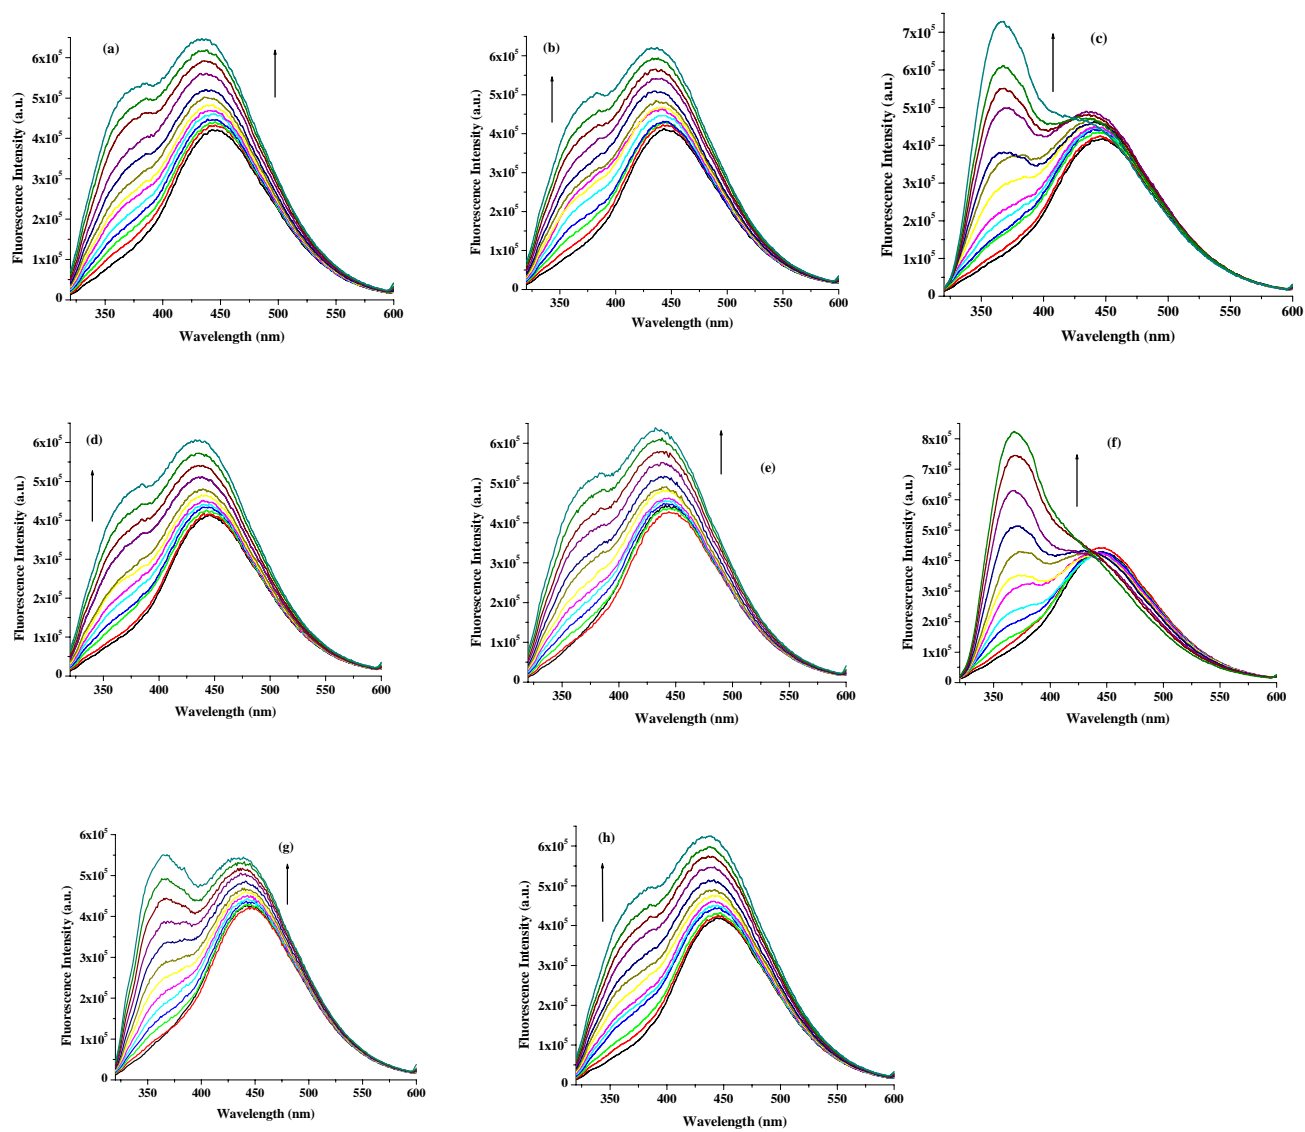

**Figure 12S.** Change in emission of **3** ( $c = 5.01 \times 10^{-5}$  M) upon addition of (a) Cl<sup>-</sup>, (b) Br<sup>-</sup>, (c) F<sup>-</sup>, (d) I<sup>-</sup>, (e) HSO<sub>4</sub><sup>-</sup>, (f) HP<sub>2</sub>O<sub>7</sub><sup>3-</sup>, (g) AcO<sup>-</sup>, (h) NO<sub>3</sub><sup>-</sup> in CH<sub>3</sub>CN containing 0.01% DMSO.

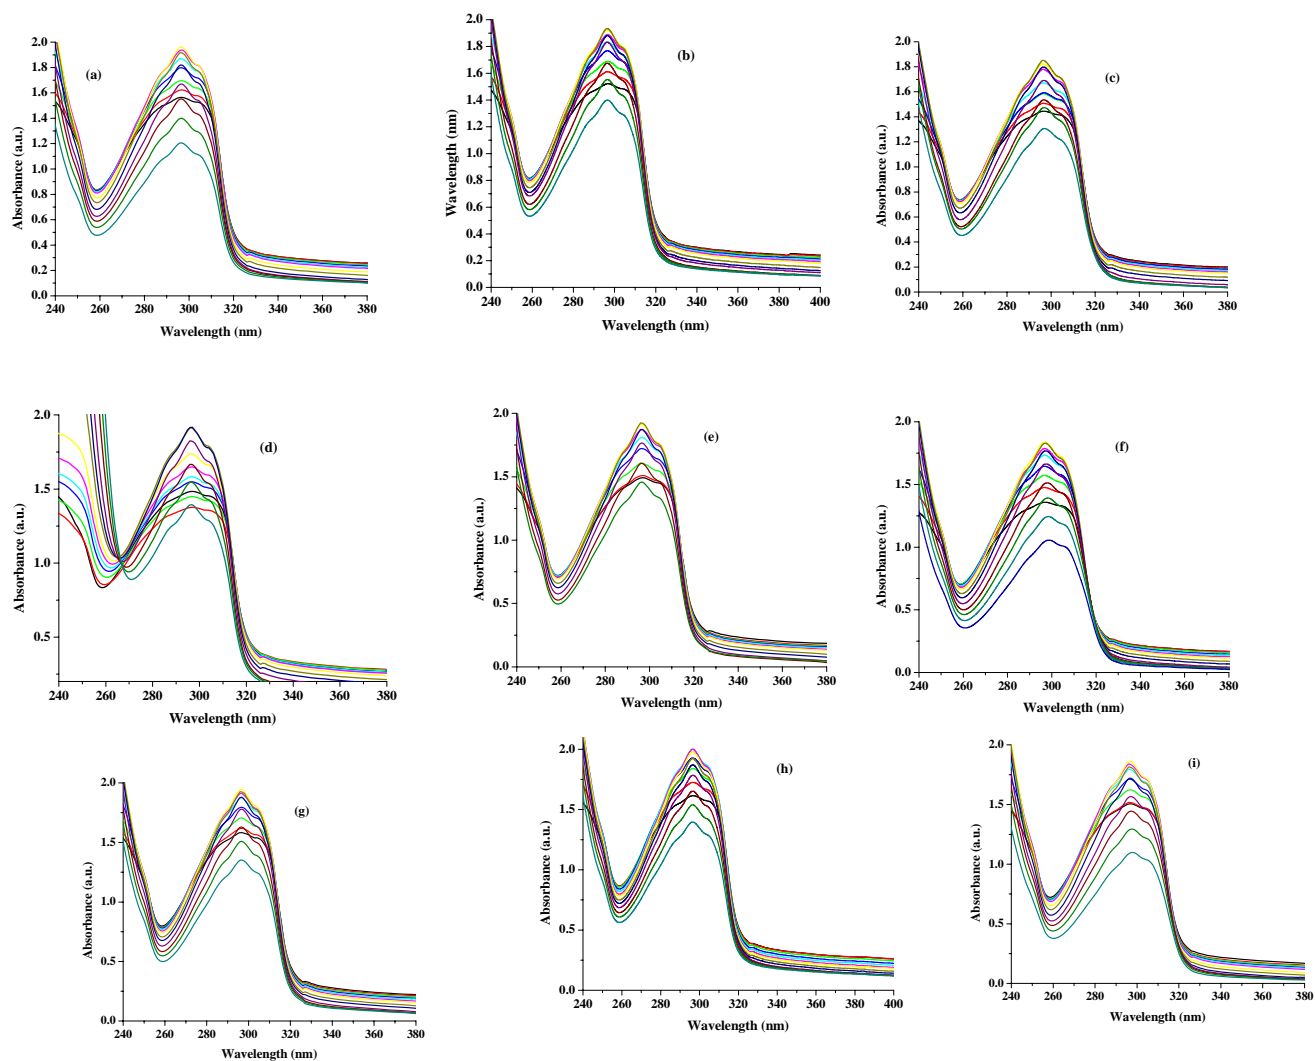

**Figure 13S.** Change in absorbance of **3** ( $c = 5.01 \times 10^{-5}$  M) upon addition of (a)  $\text{Cl}^-$ , (b)  $\text{Br}^-$ , (c)  $\text{F}^-$ , (d)  $\text{I}^-$ , (e)  $\text{HSO}_4^-$ , (f)  $\text{HP}_2\text{O}_7^{3-}$ , (g)  $\text{AcO}^-$ , (h)  $\text{NO}_3^-$ , (i)  $\text{H}_2\text{PO}_4^-$  in  $\text{CH}_3\text{CN}$  containing 0.01% DMSO.

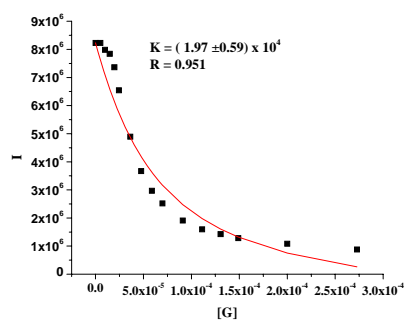

**Figure 14S.** Nonlinear binding constant curve for tetrabutylammonium dihydrogenphosphate ( $c=1 \times 10^{-3} \text{ M}$ ) with receptor 1 ( $c=2.25 \times 10^{-5} \text{ M}$ ) at 363 nm in  $\text{CH}_3\text{CN}$  containing 0.01% DMSO.

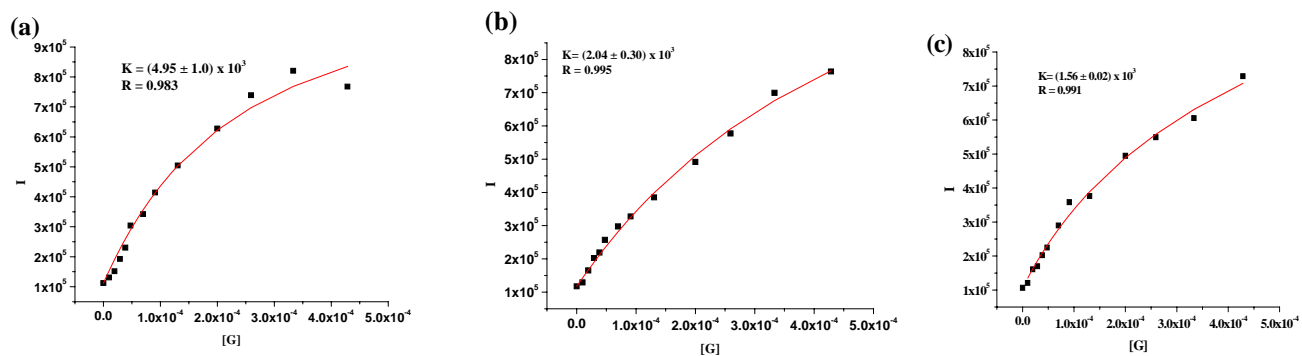

**Figure 15S.** Nonlinear binding constant curves for (a) tetrabutylammonium hydrogenpyrophosphate (b) tetrabutyl ammonium dihydrogenphosphate, (c) tetrabutylammonium fluoride ( $c = 1 \times 10^{-3} \text{ M}$ ) with receptor 3 ( $c = 5.01 \times 10^{-5} \text{ M}$ ) at 366 nm in  $\text{CH}_3\text{CN}$  containing 0.01% DMSO.



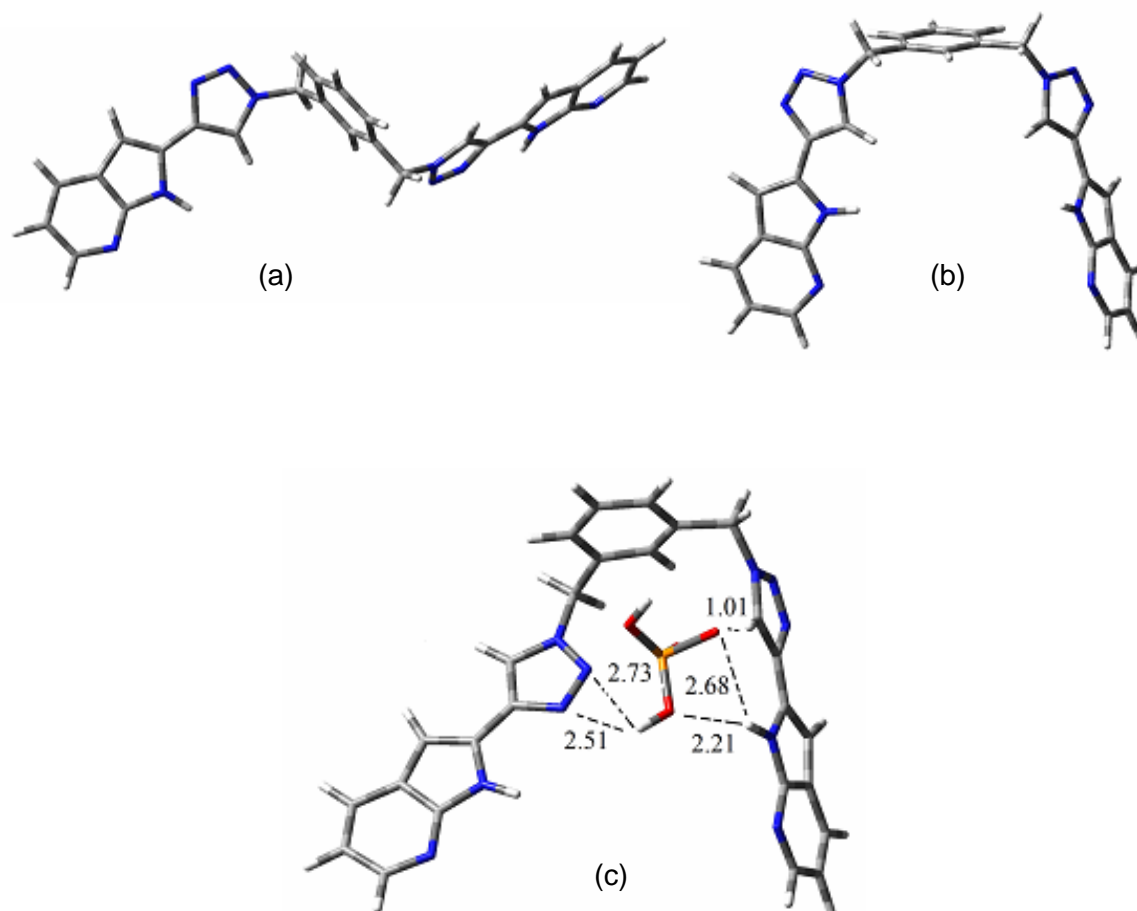

**Figure 16S.** PM6 optimized geometries of the (a) *anti*, (b) *syn* and (c)  $\text{H}_2\text{PO}_4^-$  complexed forms of **1**. Numerical values in the complex (c) indicate the hydrogen bond distances in Å and the *anti* form is stable by 3.01 kcal/mol over the *syn* form.

**<sup>1</sup>H NMR (400 MHz, d<sub>6</sub>-DMSO)**

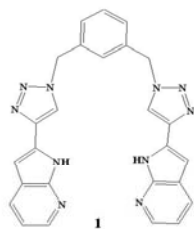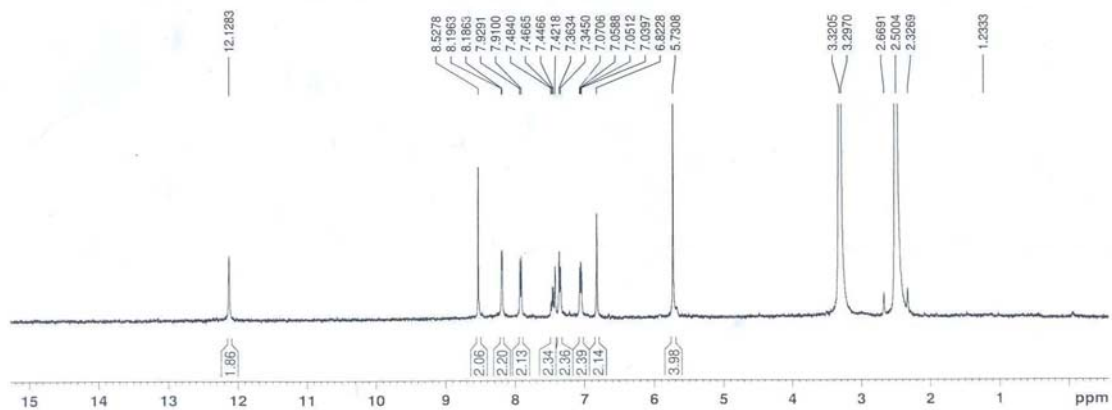

**$^{13}\text{C}$  NMR (100 MHz,  $\text{d}_6\text{-DMSO}$ )**

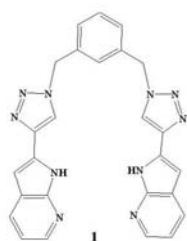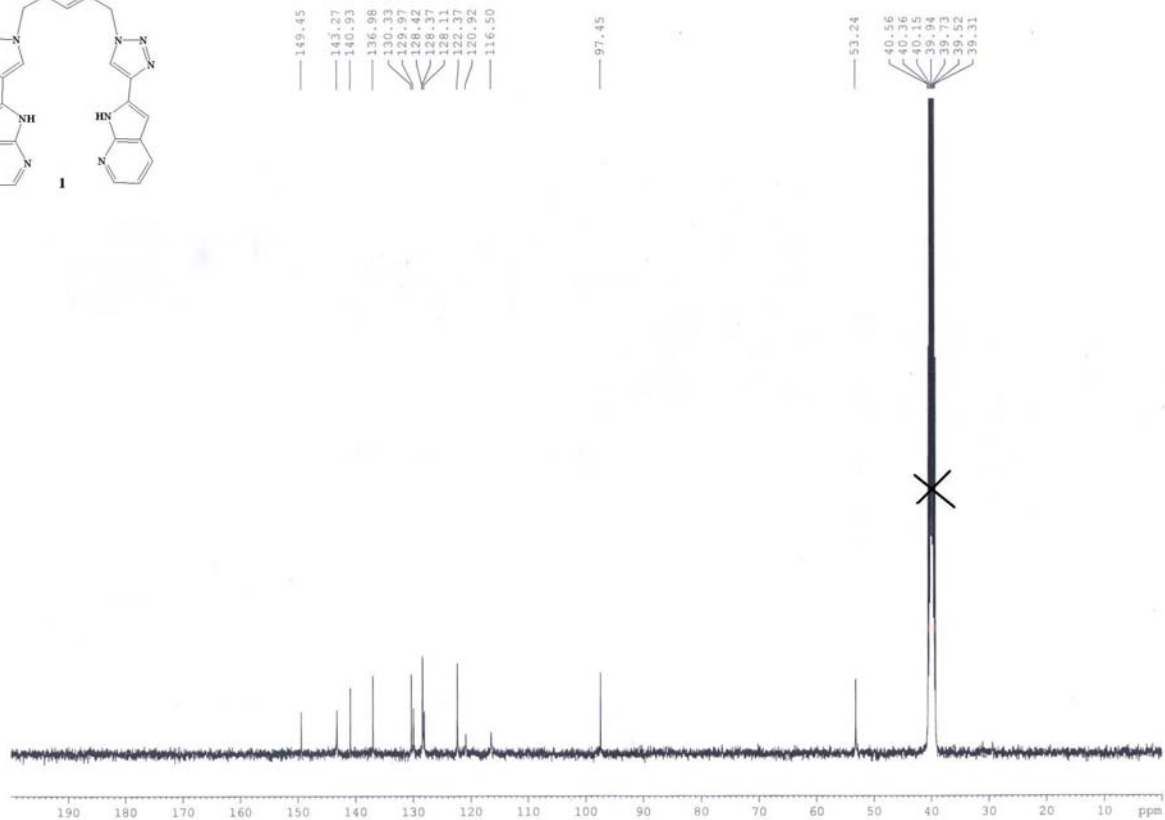

## HRMS

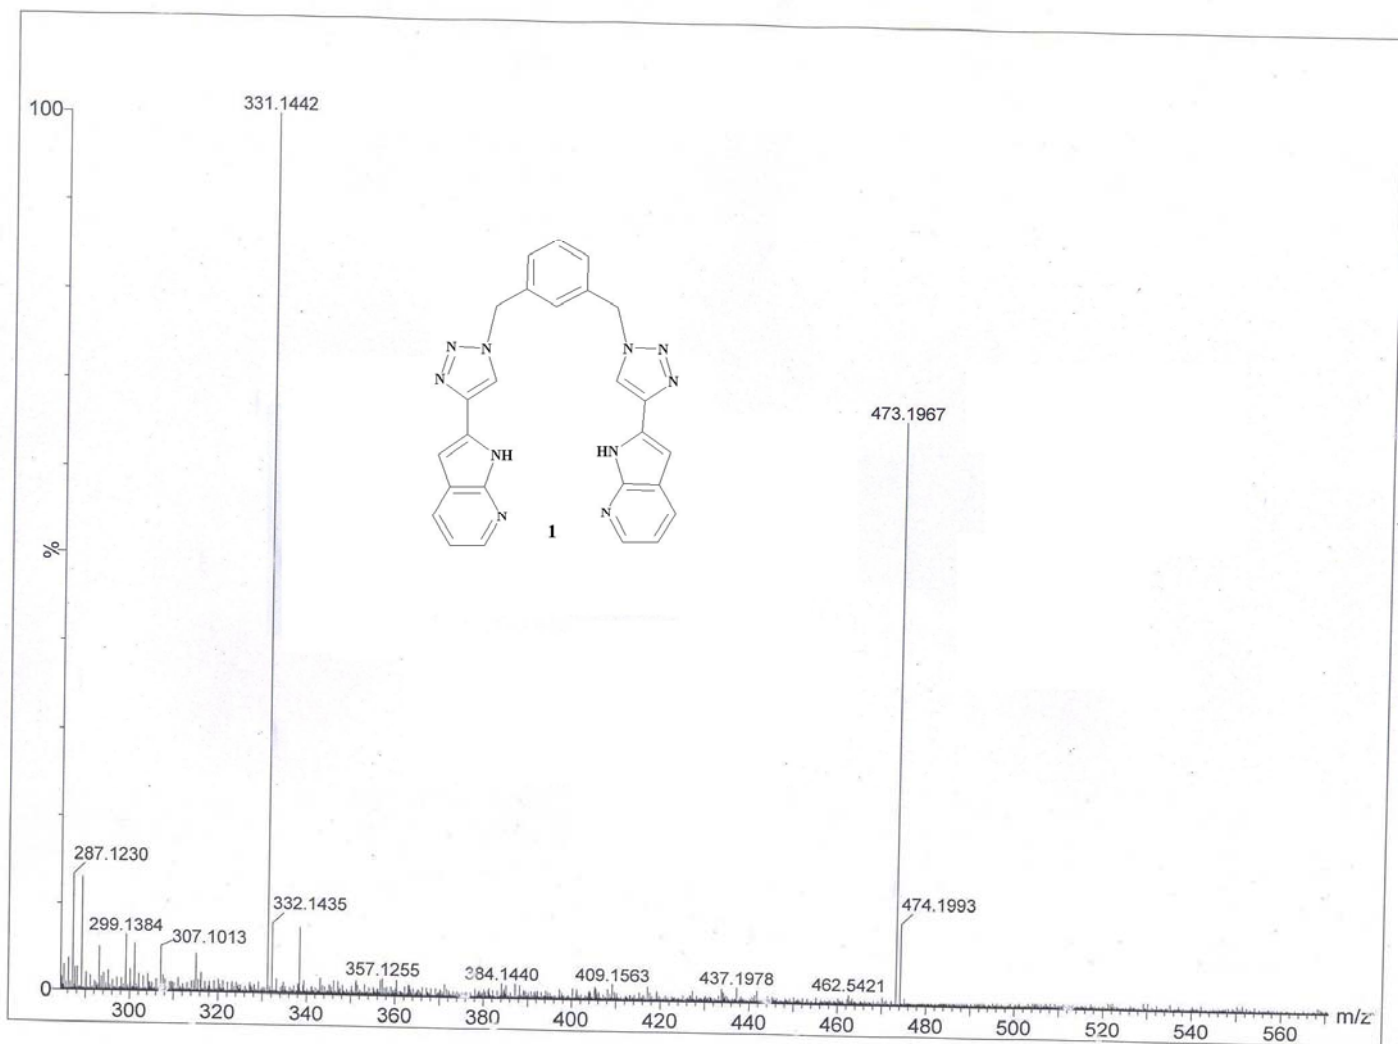

**<sup>1</sup>H NMR (400 MHz, d<sub>6</sub>-DMSO)**

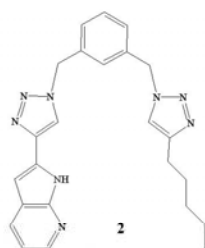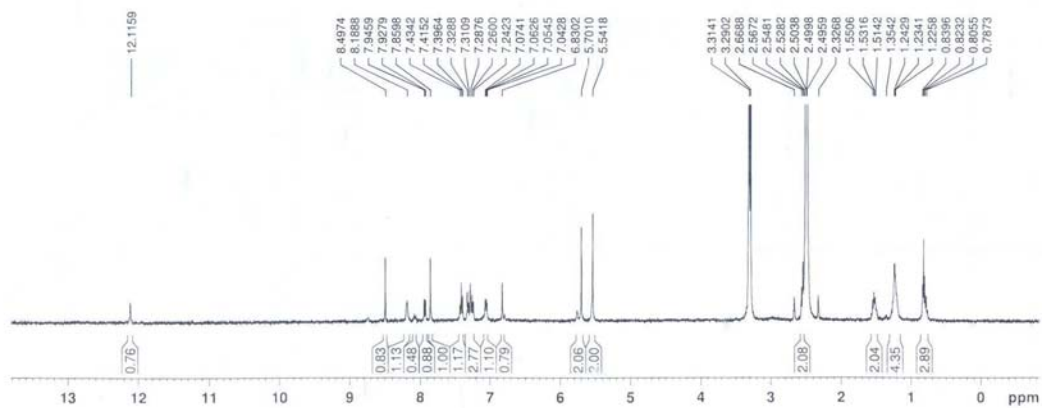

**$^{13}\text{C}$  NMR (100 MHz,  $\text{d}_6\text{-DMSO}$ )**

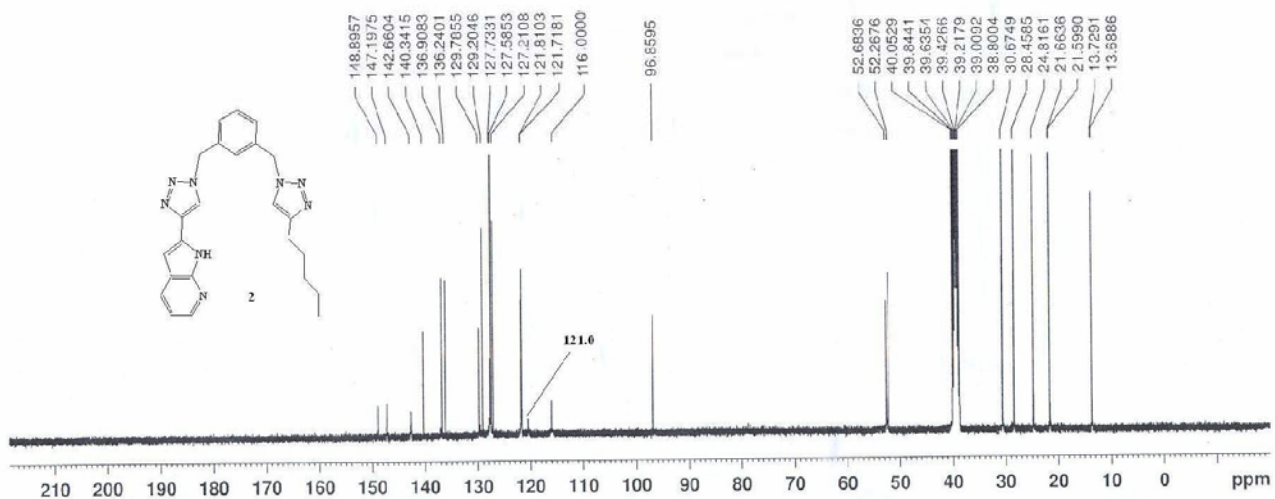

## HRMS

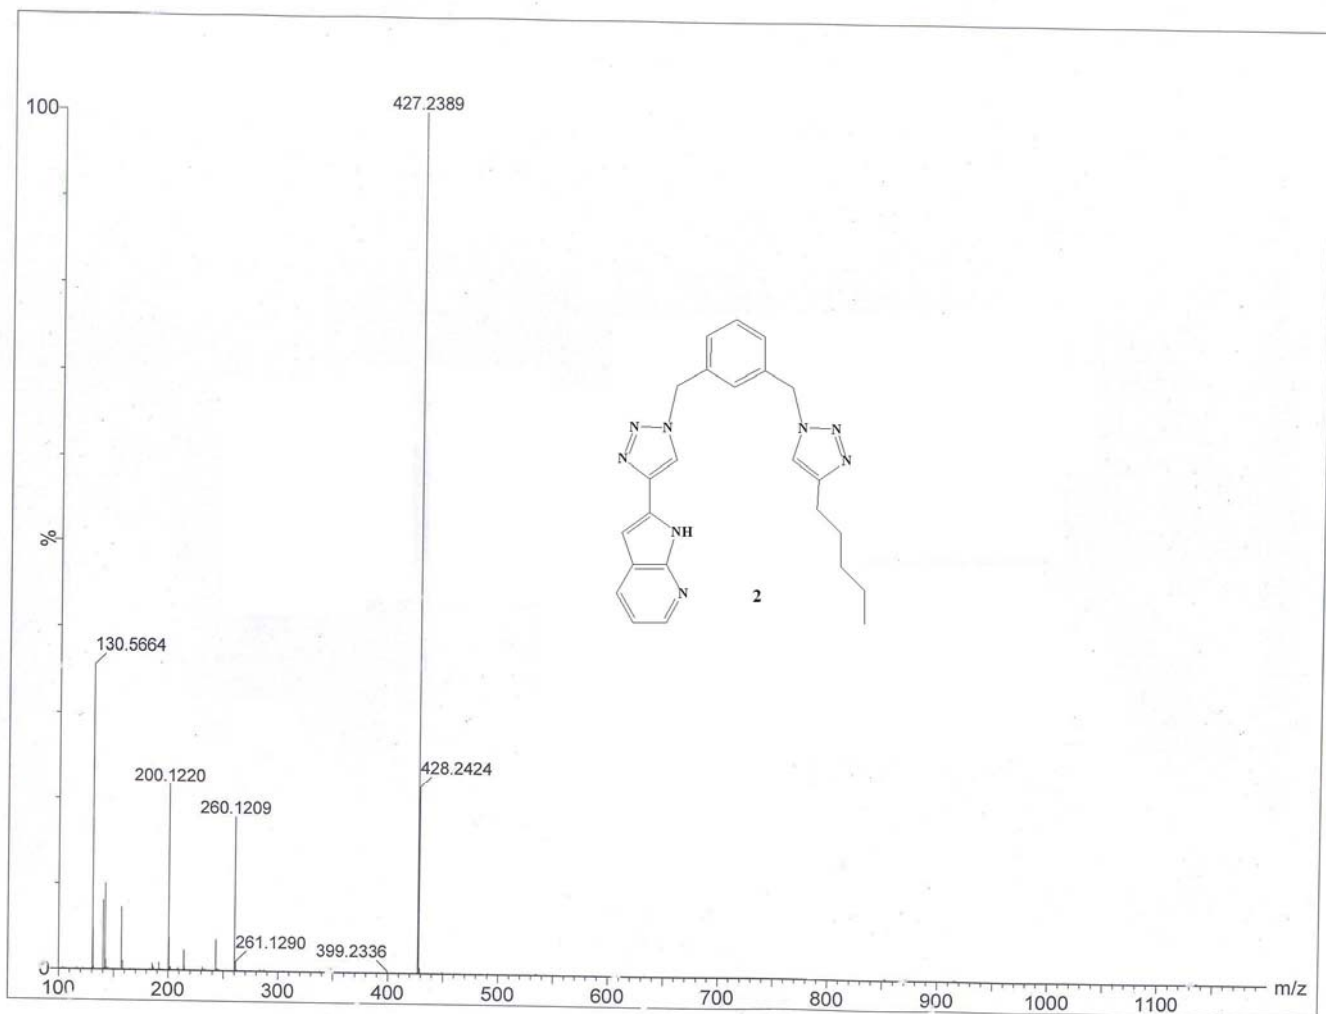

$^1\text{H}$  NMR (400 MHz,  $\text{d}_6$ -DMSO)

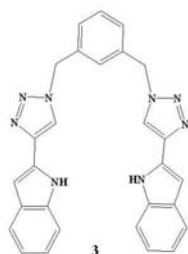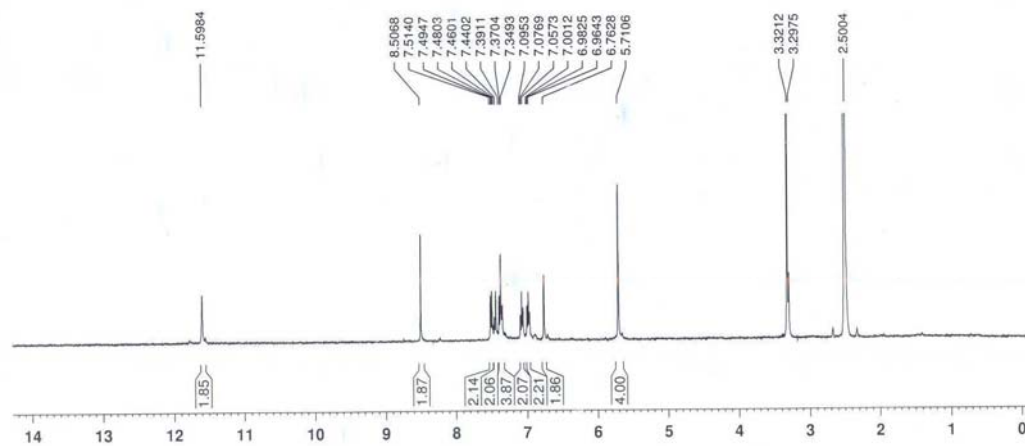



$^{13}\text{C}$  NMR (100 MHz,  $\text{d}_6$ -DMSO)

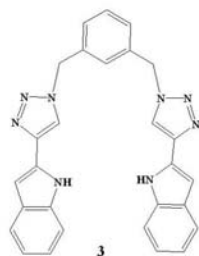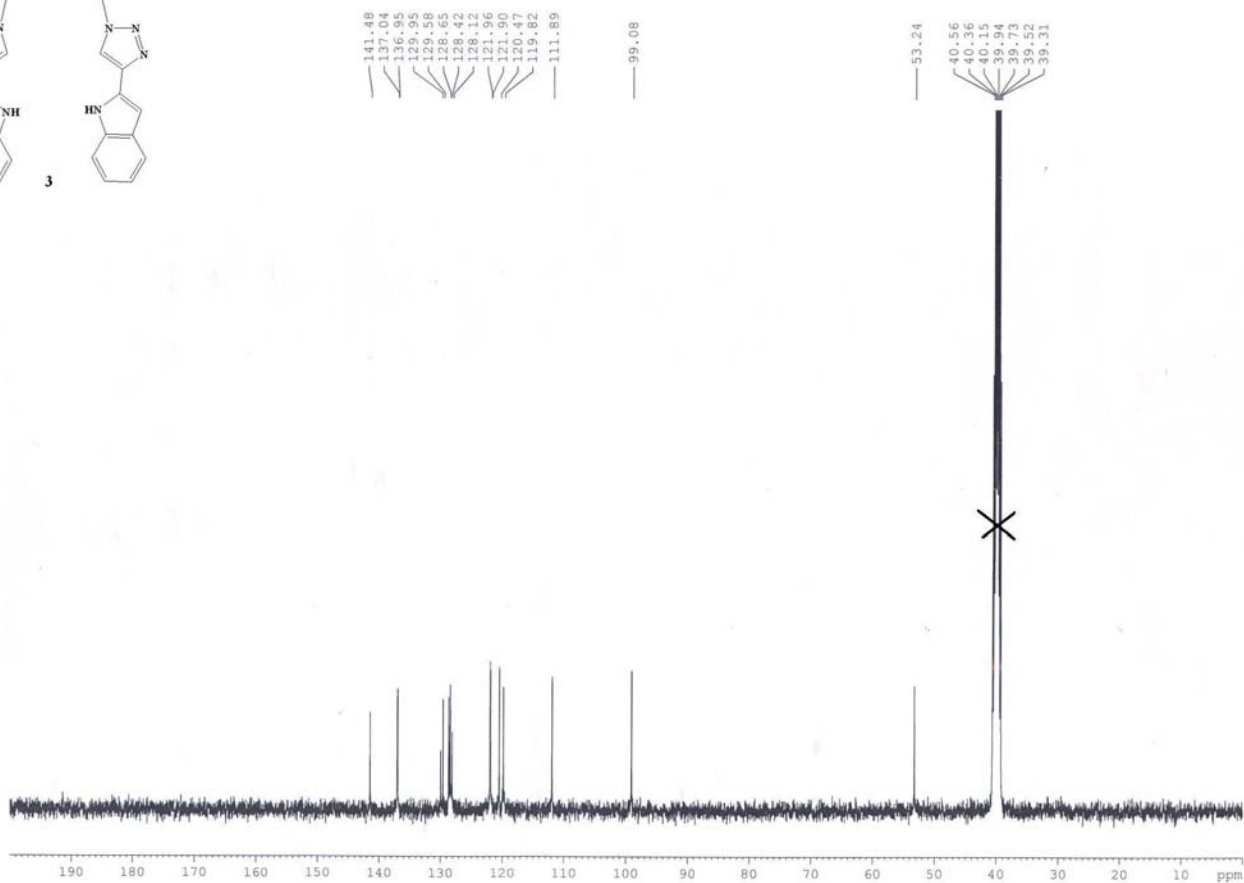

## HRMS

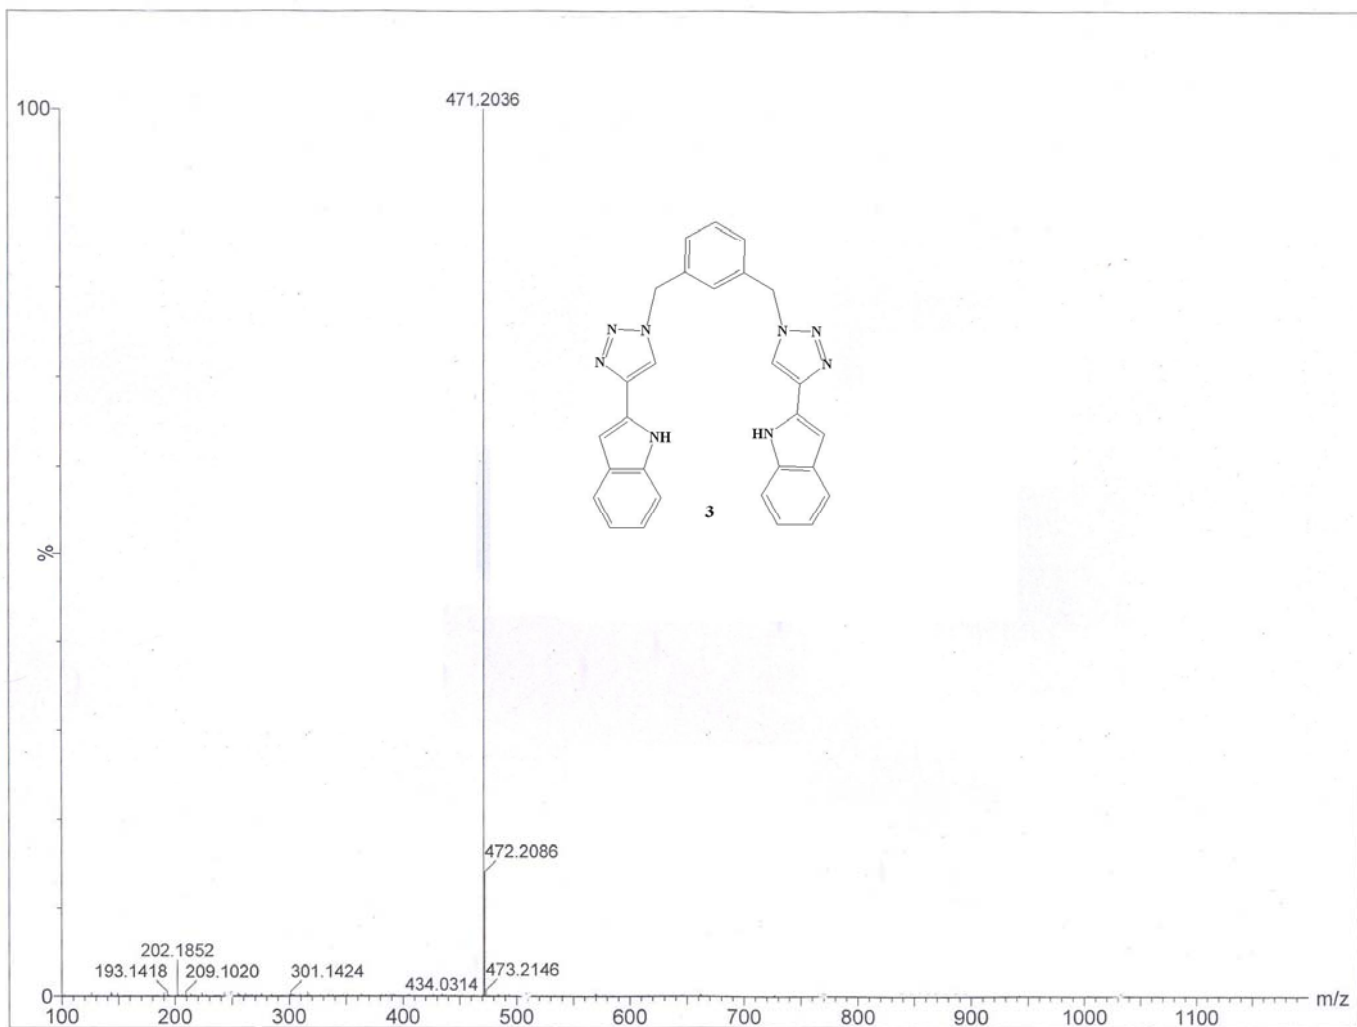

Supplement: c3ra42702a.pdf [file c3ra42702a.pdf]
